# Supplementary material
Source: PubMed Central journal article supplement (PMC17214)

3-20 ---G---A-CC---A-----G-----A-A--A-GA-----CT-GG-T---A-----T-A--A-A--TTA--A-CACA-TAA•-ACTCAG---C-----  
3-43 ---G---A-C-C-A-----A-----G-----A--A--A-GA-----CT-GG-T---A-C-A-T-AA-A-A--T-----AG--TTA•-ACTCTG---CA--T---

Heptamer

23bp-Spacer

Nonamer

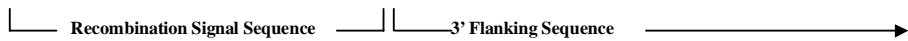

Supplement: pnas_97_21_11415__6.pdf [file pnas_97_21_11415__6.pdf]
